# Supplementary material for: Long-term legacy of phytoremediation on plant succession and soil microbial communities in petroleum-contaminated sub-Arctic soils
Source: Copernicus journal article supplement (doi:10.5194/egusphere-2023-2097), 2023-12-18
Supplement: Supplementary file 1 [file egusphere-2023-2097-supplement.pdf]

*Supplementary Materials*

**Long-term legacy of phytoremediation on plant succession and soil microbial communities in petroleum-contaminated sub-Arctic soils**

Mary-Cathrine Leewis<sup>1,2,3\*</sup>, Christopher Kasanke<sup>2,3,4</sup>, Ondrej Uhlík<sup>5</sup>, Mary Beth Leigh<sup>2,3</sup>

<sup>1</sup> *Agriculture and Agri-Food Canada, Quebec City, QC, Canada.*

<sup>2</sup> *Institute of Arctic Biology, University of Alaska Fairbanks, Fairbanks, AK, USA*

<sup>3</sup> *Department of Biology and Wildlife, University of Alaska Fairbanks, Fairbanks, AK, USA*

<sup>4</sup> *Walla Walla Community College, Walla Walla, WA, USA*

<sup>5</sup> *University of Chemistry and Technology Prague, Department of Biochemistry and Microbiology, Prague, Czechia*

**\*Corresponding author:** Phone: +1 581-443-1597; email: mcleewis@alaska.edu; mary-cathrine.leewis@agr.gc.ca

**Keywords:** Remediation, diesel, petroleum, re-vegetation, long-term field trial, microbial degradation

*Table S1: Assignments of phospholipid fatty acid (PLFA) biomarkers to biological group*

| Classification         | PLFA Biomarkers                                         |
|------------------------|---------------------------------------------------------|
| Gram-positive bacteria | i15:0; a15:0; i16:0; i17:0; a17:0                       |
| Gram-negative bacteria | cy17:0; 18:1 $\omega$ 7c                                |
| Fungi                  | 18:3 $\omega$ 3,6,9; 18:2 $\omega$ 6,9; 18:1 $\omega$ 9 |
| Actinomycetes          | 10Me 16:0; 10Me 17:0; 10Me 18:0                         |
| AM Fungi               | 16:1 $\omega$ 5                                         |
| Protozoa               | 20:4 $\omega$ 6c                                        |
| Unspecific biomarkers  | 15:0                                                    |

Table S2. Soil chemistry measurements and textural characteristics from each plot. For each plot three subsections were measured, data presented as average and standard error. Data reaggreated from (Leewis et al., 2013)

| Contaminant | Original Treatment | pH (ppm)    | NO <sub>3</sub> -N (ppm) | P (ppm)        | K (ppm)       | CEC (meq/100) | %C          |
|-------------|--------------------|-------------|--------------------------|----------------|---------------|---------------|-------------|
| CrudeOil    | c1                 | 6.87 ± 0.04 | 30.00 ± 1.67             | 2.67 ± 0.19    | 50.67 ± 1.39  | 2.56 ± 0.06   | 1.29 ± 0.09 |
|             | c2                 | 7.14 ± 0.01 | 4.67 ± 0.84              | 1.00 ± 0.00    | 35.33 ± 1.35  | 1.99 ± 0.02   | 0.92 ± 0.02 |
|             | f                  | 6.80 ± 0.05 | 17.67 ± 2.17             | 134.00 ± 13.53 | 58.00 ± 2.96  | 2.43 ± 0.06   | 1.15 ± 0.03 |
|             | p1                 | 7.26 ± 0.03 | 2.67 ± 0.96              | 1.67 ± 0.19    | 32.33 ± 0.84  | 1.88 ± 0.10   | 0.87 ± 0.03 |
|             | p1f                | 6.57 ± 0.02 | 17.33 ± 2.69             | 89.67 ± 8.26   | 57.33 ± 0.84  | 2.49 ± 0.02   | 1.50 ± 0.02 |
|             | p2                 | 7.09 ± 0.03 | 3.33 ± 0.69              | 1.33 ± 0.19    | 26.33 ± 0.69  | 1.66 ± 0.04   | 0.94 ± 0.02 |
|             | p2f                | 6.69 ± 0.04 | 2.67 ± 0.51              | 158.67 ± 17.28 | 55.33 ± 3.02  | 2.08 ± 0.02   | 1.28 ± 0.00 |
| Diesel      | c1                 | 5.96 ± 0.15 | 32.33 ± 2.14             | 4.00 ± 0.58    | 59.67 ± 2.52  | 4.68 ± 0.15   | 2.75 ± 0.08 |
|             | c2                 | 5.51 ± 0.01 | 13.67 ± 0.69             | 2.00 ± 0.00    | 52.67 ± 3.10  | 4.93 ± 0.19   | 3.23 ± 0.17 |
|             | f                  | 5.14 ± 0.04 | 39.67 ± 2.80             | 91.33 ± 6.68   | 62.33 ± 3.75  | 5.59 ± 0.28   | 3.51 ± 0.12 |
|             | p1                 | 5.40 ± 0.03 | 18.33 ± 2.17             | 2.00 ± 0.00    | 46.33 ± 1.64  | 5.01 ± 0.08   | 3.48 ± 0.07 |
|             | p1f                | 4.72 ± 0.01 | 81.00 ± 9.45             | 96.00 ± 2.08   | 79.33 ± 5.64  | 5.31 ± 0.15   | 3.17 ± 0.16 |
|             | p2                 | 5.36 ± 0.04 | 40.67 ± 15.49            | 2.67 ± 0.38    | 51.33 ± 4.25  | 4.88 ± 0.24   | 3.08 ± 0.07 |
|             | p2f                | 5.11 ± 0.05 | 17.67 ± 3.83             | 161.00 ± 17.21 | 115.33 ± 9.25 | 6.05 ± 0.22   | 3.02 ± 0.10 |

*Table S3: Count data of the plant species present in each treatment cell (average and standard deviation of the 6 pseudo-replicated cells). Top of table is plants and seedlings (< 20 cm tall), bottom of table is woody shrubs and trees with height > 20 cm. Treatments are defined as follows: no treatment (c1, c2), planted with annual ryegrass (p), a mix of annual ryegrass and Arctared fescue (p2), treated with fertilizer (f), and/or no added nutrients (no "f" indicated).*

Please see excel file.

Table S4: Average and standard deviation of PLFAs (nmol per gram soil) for total microbial biomass, total bacterial biomass, and subgroups as identified in table S1.

| Contaminant | Original Treatment | Total Microbial Biomass | Total Bacterial Biomass | G+        | G-        | Actinobacteria | Fungi      | Protozoa  | Unclassified |
|-------------|--------------------|-------------------------|-------------------------|-----------|-----------|----------------|------------|-----------|--------------|
| Crude Oil   | c1                 | 20.33 ± 9.23            | 8.99 ± 3.4752           | 3.3 ± 1.3 | 5.7 ± 2.3 | 1.46 ± 0.53    | 7.63 ± 4.2 | 0.6 ± 0.3 | 0.2 ± 0.1    |
|             | c2                 | 6.104 ± 0.68            | 3.62 ± 0.4229           | 1.9 ± 0.2 | 1.7 ± 0.2 | 0.87 ± 0.1     | 1.56 ± 0.4 | 0.1 ± 0   | 0.1 ± 0      |
|             | f                  | 19.85 ± 3.45            | 9.43 ± 1.7092           | 3.8 ± 0.8 | 5.6 ± 1   | 1.15 ± 0.51    | 7.18 ± 1.9 | 0.3 ± 0.2 | 0.2 ± 0      |
|             | p1                 | 6.557 ± 4.79            | 3.17 ± 0.7301           | 1.6 ± 0.5 | 1.6 ± 0.3 | 0.91 ± 0.26    | 0.73 ± 0.3 | 0.1 ± 0.1 | 0 ± 0        |
|             | p1f                | 22.89 ± 3.32            | 11 ± 1.2089             | 4.1 ± 0.7 | 6.9 ± 0.8 | 1.49 ± 0.65    | 7.43 ± 1.8 | 0.5 ± 0.1 | 0.2 ± 0      |
|             | p2                 | 9.073 ± 0.28            | 5.8 ± 0.0682            | 2.7 ± 0.1 | 3.1 ± 0.2 | 1.36 ± 0.04    | 1.66 ± 0.2 | 0.2 ± 0.1 | 0.1 ± 0      |
|             | p2f                | 18.75 ± 3.47            | 10.1 ± 0.873            | 4.4 ± 0.3 | 5.7 ± 0.7 | 1.63 ± 0.47    | 4.55 ± 1.4 | 0.5 ± 0.1 | 0.2 ± 0      |
| Diesel      | c1                 | 10.95 ± 2.11            | 4.53 ± 0.6023           | 1.8 ± 0.3 | 2.7 ± 0.3 | 0.86 ± 0.16    | 3.97 ± 1.5 | 0.2 ± 0.1 | 0.1 ± 0      |
|             | c2                 | 11.52 ± 4.28            | 4.87 ± 1.5338           | 2.4 ± 1   | 2.5 ± 0.7 | 0.92 ± 0.2     | 4.21 ± 1.9 | 0.2 ± 0.1 | 0.1 ± 0.1    |
|             | f                  | 23.96 ± 3.61            | 7.03 ± 0.7067           | 2.7 ± 0.4 | 4.3 ± 0.4 | 1.07 ± 0.14    | 11.6 ± 2.4 | 0.6 ± 0.1 | 0.3 ± 0.1    |
|             | p1                 | 9.941 ± 1.13            | 4.28 ± 0.3316           | 1.9 ± 0.2 | 2.4 ± 0.2 | 0.9 ± 0.08     | 3.55 ± 0.7 | 0.2 ± 0   | 0.1 ± 0      |
|             | p1f                | 19.51 ± 5.84            | 7.09 ± 2.3147           | 3 ± 1.2   | 4.1 ± 1.2 | 1.19 ± 0.43    | 8.23 ± 3.4 | 0.9 ± 0.4 | 0.1 ± 0.1    |
|             | p2                 | 12.99 ± 5.05            | 4.97 ± 1.0348           | 2.1 ± 0.5 | 2.9 ± 0.5 | 0.92 ± 0.16    | 5.1 ± 3.2  | 0.4 ± 0.1 | 0.1 ± 0.1    |
|             | p2f                | 10.53 ± 4.68            | 5.42 ± 2.1746           | 2.5 ± 1.1 | 2.9 ± 1.1 | 1.14 ± 0.34    | 2.59 ± 1.4 | 0.6 ± 0.6 | 0.1 ± 0      |

Table S5: Average and standard deviation of number of OTUs (Num. OTU) and Shannon diversity index for the 16S rRNA gene sequence data.

| Contaminant | Original Treatment | Num. OTU |          | Shannon Index |        |
|-------------|--------------------|----------|----------|---------------|--------|
| CrudeOil    | c1                 | 2164.00  | ± 230.98 | 5.71          | ± 0.19 |
|             | c2                 | 1660.00  | ± 242.25 | 5.80          | ± 0.25 |
|             | f                  | 1449.33  | ± 107.72 | 5.42          | ± 0.29 |
|             | p1                 | 1488.67  | ± 49.97  | 5.34          | ± 0.15 |
|             | p1f                | 1420.00  | ± 680.71 | 5.66          | ± 0.45 |
|             | p2                 | 1509.67  | ± 39.53  | 5.43          | ± 0.23 |
|             | p2f                | 1901.67  | ± 82.78  | 5.79          | ± 0.01 |
| Diesel      | c1                 | 2127.33  | ± 297.77 | 5.47          | ± 0.20 |
|             | c2                 | 2085.00  | ± 397.14 | 5.34          | ± 0.44 |
|             | f                  | 1898.33  | ± 356.24 | 5.11          | ± 0.47 |
|             | p1                 | 2016.67  | ± 165.40 | 5.07          | ± 0.18 |
|             | p1f                | 1667.00  | ± 8.19   | 4.75          | ± 0.03 |
|             | p2                 | 1826.67  | ± 242.46 | 4.80          | ± 0.78 |
|             | p2f                | 1885.33  | ± 423.93 | 5.42          | ± 0.45 |

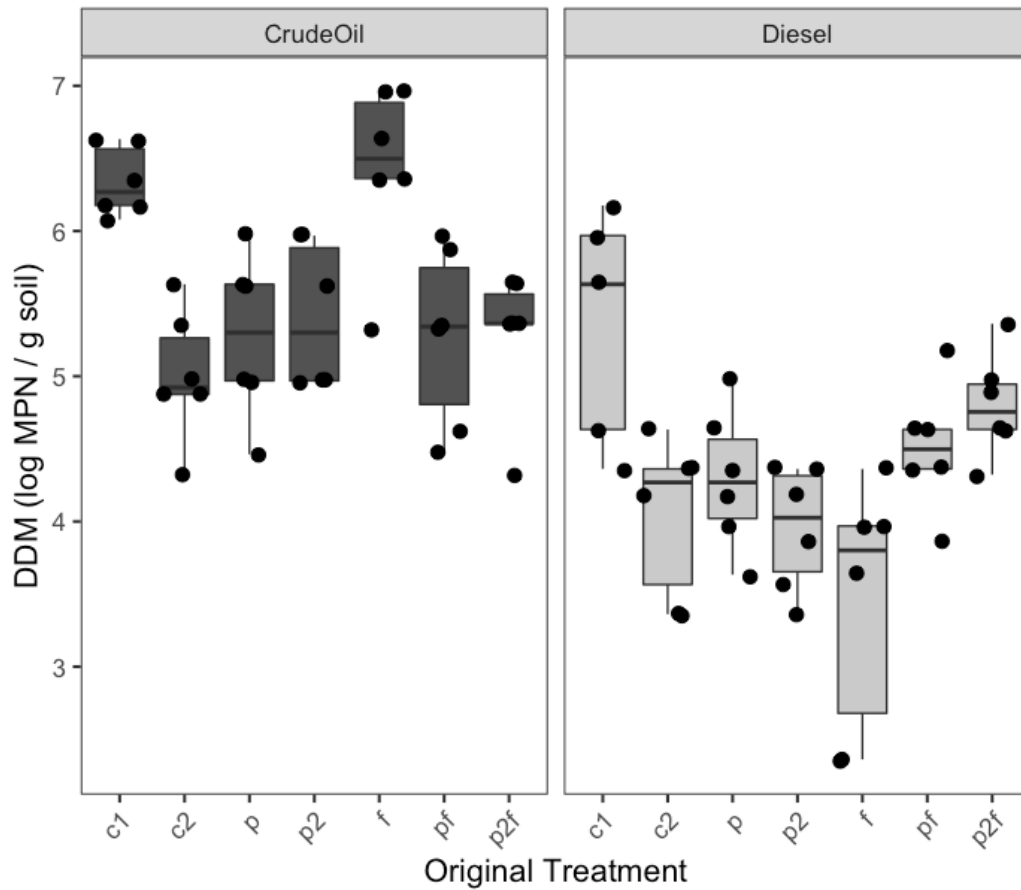

Figure S1: Most probable number (MPN) of diesel degrading microorganisms in either Crude Oil (dark grey) or Diesel (light grey) soils. Measurements were based on 10 triplicate 1 g soil samples. The values shown are means with 95% confidence intervals ( $N = 6$ ). Treatments indicated are as follows: no treatment (c1, c2), planted with annual ryegrass (p), a mix of annual ryegrass and Arctared fescue (p2), treated with fertilizer (f), and/or no added nutrients (no "f" indicated).

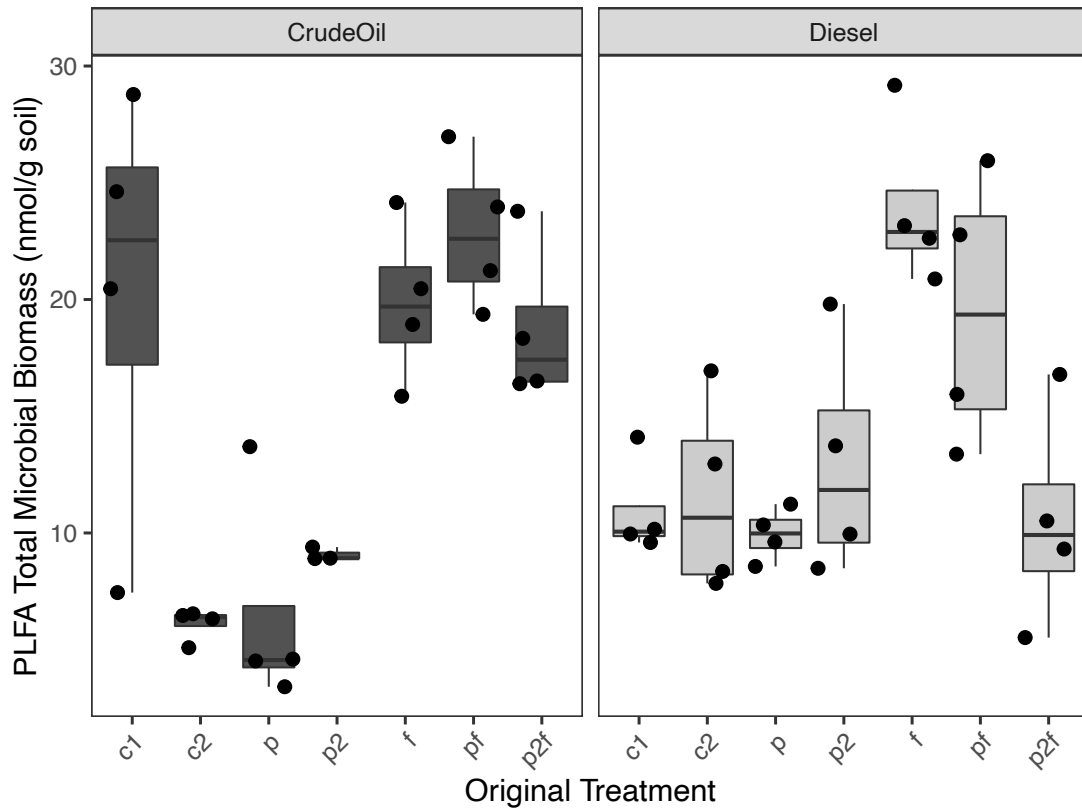

Figure S2: Total microbial biomass as measured by PLFA biomarkers.



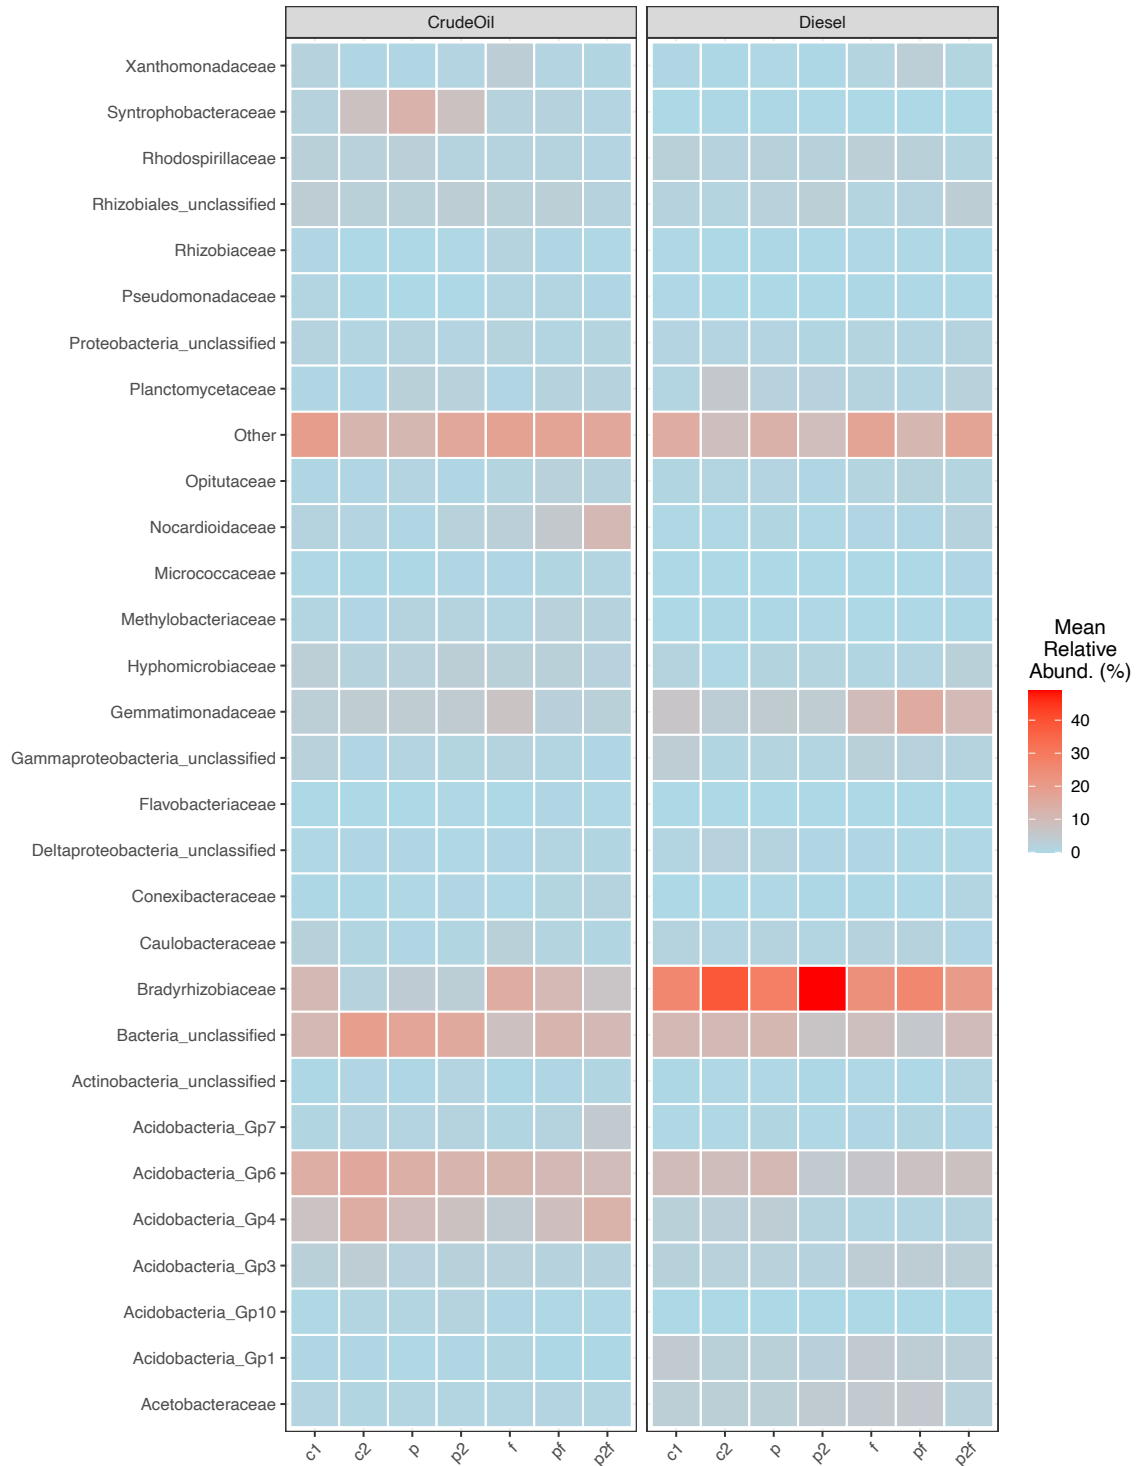

Figure S3: heat map of the relative abundance of the families greater than 2% abundant in crude oil (left) or diesel (right) contaminated soils. The colours ranging from blue to red indicate the gradient in relative abundance of the family (R.A.% = Relative Abundance).
